# Supplementary material for: The determinants of COVID-induced brain dysfunctions after SARS-CoV-2 infection in hospitalized patients
Source: Frontiers journal article supplement (doi:10.3389/fnins.2023.1249282), 2024-01-08
Supplement: Data_Sheet_1.PDF [file Data_Sheet_1.PDF]

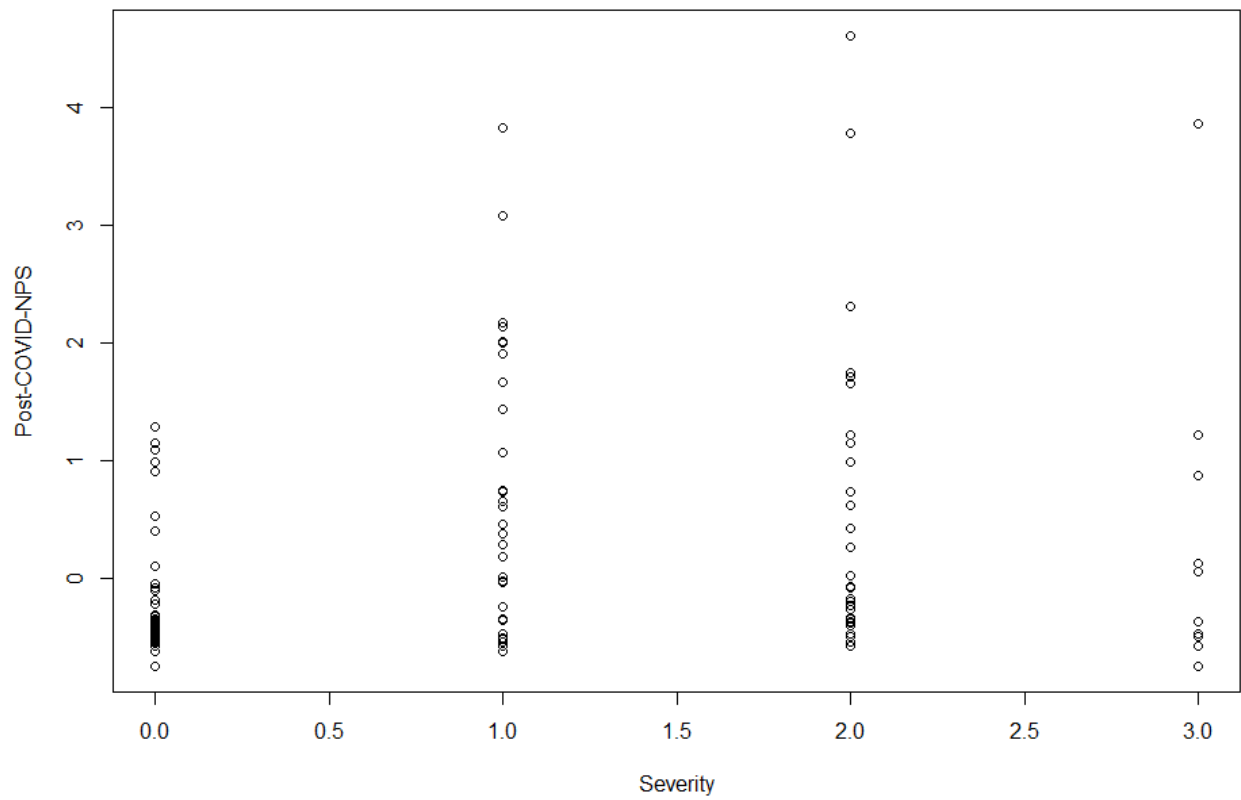

**Scatter plot between COVID-19 Severity and Post-COVID-NPS to plot individual data points.**
